# Supplementary material for: Economic evaluation of a web-based menu planning intervention to improve childcare service adherence with dietary guidelines.
Source: Research Square preprint supplement (doi:10.21203/rs.3.rs-37439/v2), 2020-11-11
Supplement: Supplementary file 1 [file 8175d6798144044ccafdd3ee.docx]

| **CHEERS CHECKLIST**  Reeves et. al. Economic evaluation of a web-based menu planning intervention to improve childcare service adherence with dietary guidelines. | | | |
| --- | --- | --- | --- |
| **Section/Item** | **Recommendation** | **Item #** | **Reported on**  **page #/ line #** |
| **Title** | Identify the study as an economic evaluation or use more specific terms such as “cost-effectiveness analysis”, and describe the interventions compared. | 1 | Page 1/ Lines 2-3 |
| **Abstract** | Provide a structured summary of objectives, perspective, setting, methods (including study design and inputs), results (including base case and uncertainty analyses), and conclusions. | 2 | Page 3-4/ Lines 68-100 |
| **Background and objectives** | Provide an explicit statement of the broader context for the study. | 3 | Page 5-7/ Lines 112-175 |
| **Target population and subgroups** | Describe characteristics of the base case population and subgroups analysed, including why they were chosen. | 4 | Page 8/ Lines 184-191 |
| **Setting and location** | State relevant aspects of the system(s) in which the decision(s) need(s) to be made. | 5 | Page 8/ Lines 187-183 |
| **Study perspective** | Describe the perspective of the study and relate this to the costs being evaluated. | 6 | Page 8/ Line 196-198 |
| **Comparators** | Describe the interventions or strategies being compared and state why they were chosen. | 7 | Page 8-9/ Lines 200-225 |
| **Time horizon** | State the time horizon(s) over which costs and consequences are being evaluated and say why appropriate. | 8 | Page 8/ Lines 198 |
| **Discount rate** | Report the choice of discount rate(s) used for costs and outcomes and say why appropriate. | 9 | Not required |
| **Choice of health outcomes** | Describe what outcomes were used as the measure(s) of benefit in the evaluation and their relevance for the type of analysis performed. | 10 | Page 9-10/ Lines 226-256 |
| **Measurement of effectiveness** | *Single study-based estimates:*Describe fully the design features of the single effectiveness study and why the single study was a sufficient source of clinical effectiveness data. | 11a | Page 9-10/ Lines 226-256 |
|  | *Synthesis-based estimates*: Describe fully the methods used for identification of included studies and synthesis of clinical effectiveness data. | 11b | N/A |
| **Measurement and valuation of preference based outcomes:** | If applicable, describe the population and methods used to elicit preferences for outcomes. | 12 | N/A |
| **Method of estimating resource cost** | *Single study-based economic evaluation:* Describe approaches used to estimate resource use associated with the alternative interventions. Describe primary or secondary research methods for valuing each resource item in terms of its unit cost. Describe any adjustments made to approximate to opportunity costs. | 13a | Page 9/ Lines 257-277 |
|  | *Model-based economic evaluation:*Describe approaches and data sources used to estimate resource use associated with model health states. Describe primary or secondary research methods for valuing each resource item in terms of its unit cost. Describe any adjustments made to approximate to opportunity costs. | 13b | N/A |
| **Currency, price date, conversion** | Report the dates of the estimated resource quantities and unit costs. Describe methods for adjusting estimated unit costs to the year of reported costs if necessary. Describe methods for converting costs into a common currency base and the exchange rate. | 14 | Page 8/ Lines 198 |
| **Choice of model** | Describe and give reasons for the specific type of decision-analytical model used. Providing a figure to show model structure is strongly recommended. | 15 | N/A |
| **Assumptions** | Describe all structural or other assumptions underpinning the decision-analytical model. | 16 | No assumptions made |
| **Analytic methods** | Describe all analytical methods supporting the evaluation. This could include methods for dealing with skewed, missing, or censored data; extrapolation methods; methods for pooling data; approaches to validate or make adjustments (such as half cycle corrections) to a model; and methods for handling population heterogeneity and uncertainty. | 17 | Page 13-14/ Lines 306-333 |
| **Study parameters** | Report the values, ranges, references, and, if used, probability distributions for all parameters. Report reasons or sources for distributions used to represent uncertainty where appropriate. Providing a table to show the input values is strongly recommended. | 18 | N/A |
| **Incremental costs and outcomes** | For each intervention, report mean values for the main categories of estimated costs and outcomes of interest, as well as mean differences between the comparator groups. If applicable, report incremental cost-effectiveness ratios. | 19 | Page 14-17/ Lines 334-400 |
| **Characterising uncertainty** | *Single study-based economic evaluation:* Describe the effects of sampling uncertainty for the estimated incremental cost and incremental effectiveness parameters, together with the impact of methodological assumptions (such as discount rate, study perspective). | 20a | Page 17-18/ Lines 402-419 |
|  | *Model-based economic evaluation:*Describe the effects on the results of uncertainty for all input parameters, and uncertainty related to the structure of the model and assumptions. | 20b | N/A |
| **Characterising heterogeneity** | If applicable, report differences in costs, outcomes, or cost-effectiveness that can be explained by variations between subgroups of patients with different baseline characteristics or other observed variability in effects that are not reducible by more information. | 21 | N/A |
| **Findings** | Summarise key study findings and describe how they support the conclusions reached. Discuss limitations and the generalisability of the findings and how the findings fit with current knowledge. | 22 | Page 19 / Lines 421-457 |
| **Limitation** |  | 22 | Page 19-20/ Lines 444-470 |
| **Generalizability and current knowledge** |  | 22 | Page 20/ Lines 472-475 |
| **Source of funding** | Describe how the study was funded and the role of the funder in the identification, design, conduct, and reporting of the analysis. Describe other non-monetary sources of support. | 23 | Page 21-22 / Lines 504-516 |
| **Conflict of interest** | Describe any potential for conflict of interest of study contributors in accordance with journal policy. In the absence of a journal policy, we recommend authors comply with International Committee of Medical Journal Editors recommendations. | 24 | Page 21/ Lines 500-504 |
